# Supplementary material for: Associations among Bruxism, Gastroesophageal Reflux Disease, and Tooth Wear
Source: PubMed Central journal article supplement (PMC6262381; doi:10.3390/jcm7110417), 2018-11-06
Supplement: jcm-07-00417-s001.pdf [file jcm-07-00417-s001.pdf]

## SUPPLEMENTARY MATERIALS

### TABLE OF CONTENTS

|                                                                                              |   |
|----------------------------------------------------------------------------------------------|---|
| <b>Table S1.</b> Characteristics of cases (with bruxism) and controls (without bruxism)..... | 2 |
| <b>Table S2.</b> Factors associated with bruxism.....                                        | 3 |
| <b>Table S3.</b> Factors associated with severe tooth wear.....                              | 4 |
| <b>Table S4.</b> Conditions of tooth wear for different subgroups.....                       | 5 |

**Table S1.** Characteristics of cases (with bruxism) and controls (without bruxism).

| <b>Characteristic</b>                          | <b>Cases (n = 363)<sup>1</sup></b> | <b>Controls (n = 363)<sup>1</sup></b> | <b>P</b> |
|------------------------------------------------|------------------------------------|---------------------------------------|----------|
| <b>Age, median (IQR), years</b>                | 28 (22 - 38)                       | 29 (23 - 39)                          | 0.720    |
| <b>Sex</b>                                     |                                    |                                       | > 0.99   |
| Male                                           | 147 (40.5)                         | 147 (40.5)                            |          |
| Female                                         | 216 (59.5)                         | 216 (59.5)                            |          |
| <b>Residence</b>                               |                                    |                                       | 0.696    |
| Urban                                          | 241 (66.4)                         | 236 (65.0)                            |          |
| Rural                                          | 122 (33.6)                         | 127 (35.0)                            |          |
| <b>BMI, median (IQR), kg/m<sup>2</sup></b>     | 21.4 (19.4 - 23.5)                 | 21.0 (19.0 - 23.7)                    | 0.833    |
| <b>Obesity</b>                                 | 8 (2.2)                            | 6 (1.7)                               | 0.589    |
| <b>Marital status</b>                          |                                    |                                       | 0.083    |
| Single                                         | 180 (49.6)                         | 151 (41.6)                            |          |
| Married                                        | 177 (48.8)                         | 207 (57.0)                            |          |
| Divorced/widowed                               | 6 (1.7)                            | 5 (1.4)                               |          |
| <b>Education level</b>                         |                                    |                                       | 0.200    |
| ≤ 9 years                                      | 37 (10.2)                          | 38 (10.5)                             |          |
| > 9 - 12 years                                 | 47 (12.9)                          | 64 (17.6)                             |          |
| > 12 years                                     | 279 (76.9)                         | 261 (71.9)                            |          |
| <b>Smoking status</b>                          |                                    |                                       | 0.091    |
| Never                                          | 280 (77.1)                         | 301 (82.9)                            |          |
| Former                                         | 22 (6.1)                           | 12 (3.3)                              |          |
| Current                                        | 61 (16.8)                          | 50 (13.8)                             |          |
| No. cigarettes/day <sup>2</sup> , median (IQR) | 10 (5 - 15)                        | 10 (6 - 20)                           | 0.789    |
| <b>Alcohol</b>                                 |                                    |                                       | 0.582    |
| None/moderate                                  | 285 (78.5)                         | 291 (80.2)                            |          |
| Heavy                                          | 78 (21.5)                          | 72 (19.8)                             |          |
| <b>Tea</b>                                     |                                    |                                       | 0.693    |
| None/less than weekly                          | 214 (59.0)                         | 204 (56.2)                            |          |
| Weekly                                         | 96 (26.4)                          | 106 (29.2)                            |          |
| Daily                                          | 53 (14.6)                          | 53 (14.6)                             |          |
| <b>Coffee</b>                                  |                                    |                                       | 0.955    |
| None/less than weekly                          | 309 (85.1)                         | 308 (84.8)                            |          |
| Weekly                                         | 49 (13.5)                          | 49 (13.5)                             |          |
| Daily                                          | 5 (1.4)                            | 6 (1.7)                               |          |
| <b>Hypertension</b>                            | 12 (3.3)                           | 11 (3.0)                              | 0.832    |

Abbreviations: BMI, body mass index; IQR, interquartile range.

<sup>1</sup> Values listed in these columns are numbers (percentages) of subjects.

<sup>2</sup> Consumption of current smokers.

**Table S2.** Factors associated with bruxism.

| <b>Variables</b>                           | <b>Bruxism (n = 363)</b> | <b>Non-bruxism (n = 363)</b> | <b>P</b> |
|--------------------------------------------|--------------------------|------------------------------|----------|
| Never married                              | 180 (49.6)               | 151 (41.6)                   | 0.031    |
| High likelihood of obstructive sleep apnea | 43 (11.8)                | 24 (6.6)                     | 0.015    |
| Pain-related temporomandibular disorder    | 80 (22.0)                | 58 (16.0)                    | 0.037    |
| Depression                                 | 71 (19.6)                | 23 (6.3)                     | < 0.001  |
| Anxiety                                    | 41 (11.3)                | 18 (5.0)                     | 0.002    |
| Impaired sleep quality                     | 180 (49.6)               | 132 (36.4)                   | < 0.001  |

Values are numbers (percentages) of subjects.

**Table S3.** Factors associated with severe tooth wear.

| <b>Variables</b>             | <b>With severe tooth wear<br/>(n = 224)<sup>1</sup></b> | <b>Without severe tooth wear<br/>(n = 502)<sup>1</sup></b> | <b>P</b> |
|------------------------------|---------------------------------------------------------|------------------------------------------------------------|----------|
| Age ≥ 31 years               | 174 (77.7)                                              | 140 (27.9)                                                 | < 0.001  |
| Male                         | 110 (49.1)                                              | 184 (36.7)                                                 | 0.002    |
| Current smoker               | 52 (23.2)                                               | 59 (11.8)                                                  | < 0.001  |
| Heavy drinker <sup>2</sup>   | 62 (27.7)                                               | 88 (17.5)                                                  | 0.002    |
| Tea consumption <sup>3</sup> | 113 (50.4)                                              | 195 (38.8)                                                 | 0.003    |
| Acidic diet <sup>4</sup>     | 93 (41.5)                                               | 129 (25.7)                                                 | < 0.001  |
| Timely rinsing <sup>5</sup>  | 3 (1.3)                                                 | 23 (4.6)                                                   | 0.030    |

Abbreviations: CI, confidence interval; GERD, gastroesophageal reflux disease; OR, odds ratio.

<sup>1</sup> Values listed in these columns are numbers (percentages) of subjects.

<sup>2</sup> Had unsafe drinking (> 15 grams/day for females and > 25 grams/day for males) at least one day a week.

<sup>3</sup> Weekly or more.

<sup>4</sup> Daily or more consumption of acidic foods.

<sup>5</sup> Rinsing immediately after exposure to intrinsic or extrinsic acids.

**Table S4.** Conditions of tooth wear for different subgroups.

| <b>Variables</b>    | <b>Non-bruxism<br/>(n = 363)</b> | <b>Bruxism<br/>without GERD<br/>(n = 295)</b> | <b>Bruxism with<br/>GERD ≤ 5 years<br/>(n = 28)</b> | <b>Bruxism with<br/>GERD &gt; 5 years<br/>(n = 40)</b> | <b>P</b> |
|---------------------|----------------------------------|-----------------------------------------------|-----------------------------------------------------|--------------------------------------------------------|----------|
| The whole dentition | 253 (69.7)                       | 262 (88.8)                                    | 27 (96.4)                                           | 40 (100.0)                                             | < 0.001  |
| <b>SURFACE</b>      |                                  |                                               |                                                     |                                                        |          |
| Occlusal/incisal    | 246 (67.8)                       | 261 (88.5)                                    | 27 (96.4)                                           | 40 (100.0)                                             | < 0.001  |
| Palatal/lingual     | 90 (24.8)                        | 151 (51.2)                                    | 21 (75.0)                                           | 29 (72.5)                                              | < 0.001  |
| Buccal/labial       | 45 (12.4)                        | 69 (23.4)                                     | 8 (28.6)                                            | 11 (27.5)                                              | < 0.001  |
| Cervical            | 19 (5.2)                         | 22 (7.5)                                      | 2 (7.1)                                             | 4 (10.0)                                               | 0.525    |
| <b>LOCATION</b>     |                                  |                                               |                                                     |                                                        |          |
| Upper               | 216 (59.5)                       | 249 (84.4)                                    | 27 (96.4)                                           | 39 (97.5)                                              | < 0.001  |
| Lower               | 237 (65.3)                       | 248 (84.1)                                    | 27 (96.4)                                           | 40 (100.0)                                             | < 0.001  |
| Anterior            | 217 (59.8)                       | 241 (81.7)                                    | 26 (92.9)                                           | 40 (100.0)                                             | < 0.001  |
| Posterior           | 212 (58.4)                       | 238 (80.7)                                    | 25 (89.3)                                           | 40 (100.0)                                             | < 0.001  |

Abbreviation: GERD, gastroesophageal reflux disease.

Values are numbers (percentages) of subjects with tooth wear into dentin.
